# Supplementary material
Source: Springer Nature journal article supplement (https://www.springermedizin.de/resource/supplementary/12967_2013_1702_MOESM4_ESM.pdf/9575148)

**Additional File 4.** Scatter plot of miRNA qPCR findings from cDNA prepared from 30 ng total RNA (y-axis) and 250 ng total RNA(x-axis) derived from FFPE (Panel A) and Caucasian sera (Panel B). Diagonal lines indicate 2-fold threshold boundaries.

**A.**

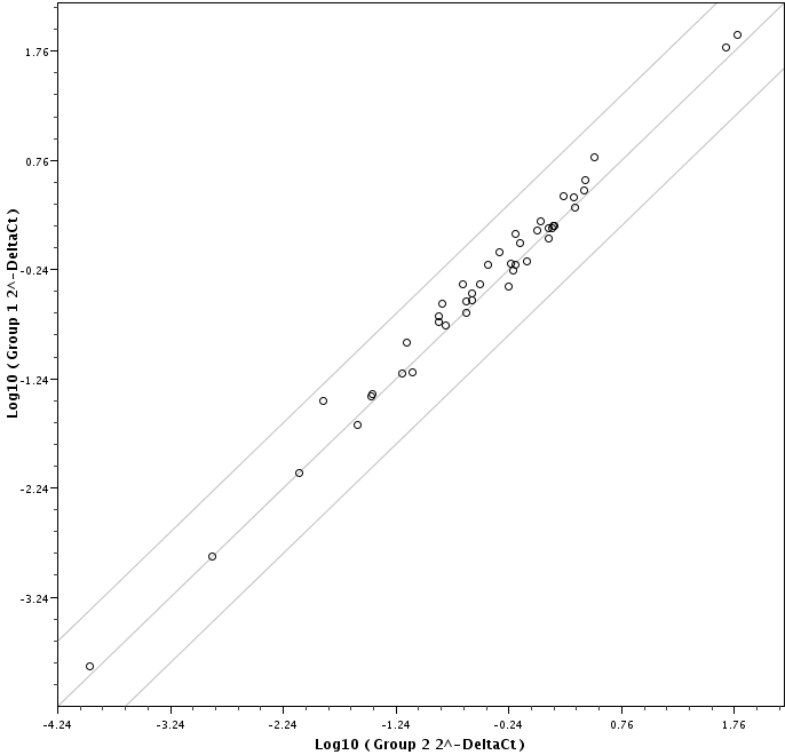

**B.**

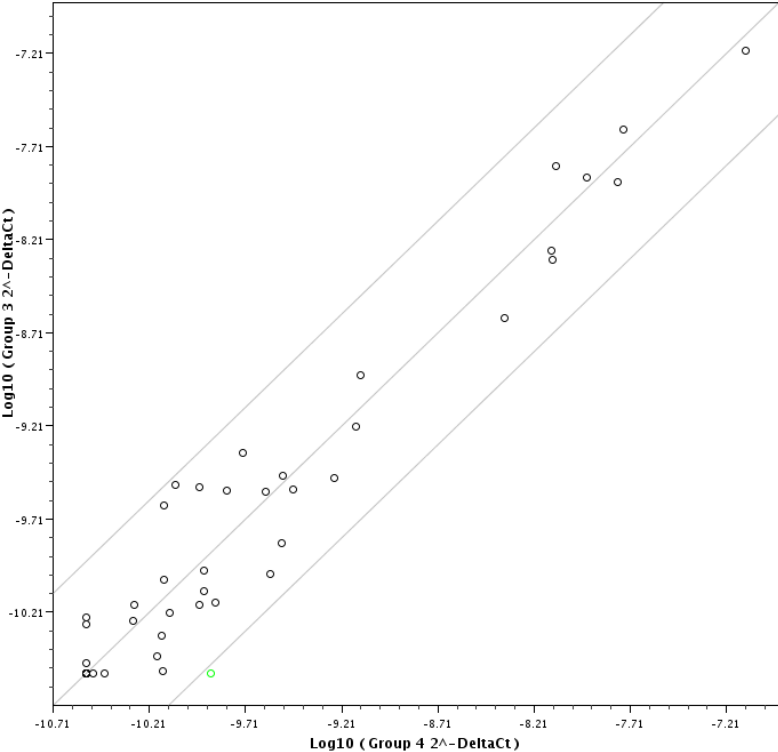

Supplement: MOESM4 [file 9575148]
